# Supplementary material for: Azaindolizine proton cranes attached to 7-hydroxyquinoline and 3-hydroxypyridine: a comparative theoretical study
Source: Royal Society of Chemistry journal article supplement (doi:10.1039/d3cp04635d), 2024-01-01
Supplement: d3cp04635d1.pdf [file d3cp04635d1.pdf]

*Supplementary Information*

Azaindolizine proton cranes attached to 7-hydroxyquinoline and 3-hydroxypyridine:  
a comparative theoretical study

Sofia Slavova<sup>1,2</sup> and Liudmil Antonov<sup>1,\*</sup>

<sup>1</sup> Institute of Electronics, Bulgarian Academy of Sciences, 1784 Sofia, Bulgaria

<sup>2</sup> Institute of General and Inorganic Chemistry, Bulgarian Academy of Sciences, 1113 Sofia, Bulgaria

Table S1. Relative energies and other electronic and structural parameters of **7HQ-A** in ground (M06-2X/TZVP) and first singlet excited (CAM-B3LYP/TZVP) state in toluene and acetonitrile (in brackets).

| Structure               | $\Delta E$       | $\Delta E+ZPE$   | $\Delta G$       | $\mu$          | $\alpha$         | axle length      | atomic charge      |                    | HOMO-LUMO gap |
|-------------------------|------------------|------------------|------------------|----------------|------------------|------------------|--------------------|--------------------|---------------|
|                         |                  |                  |                  |                |                  |                  | O                  | N                  |               |
|                         |                  | [kcal/mol]       | [D]              | [ $^{\circ}$ ] | [ $\text{\AA}$ ] |                  |                    |                    | eV            |
| Ground state            |                  |                  |                  |                |                  |                  |                    |                    |               |
| <b>E</b>                | 0.00<br>(0.00)   | 0.00<br>(0.00)   | 0.00<br>(0.00)   | 4.2<br>(5.1)   | 0<br>(0)         | 1.467<br>(1.468) | -0.680<br>(-0.694) | -0.538<br>(-0.550) | 6.0 (6.0)     |
| <b>TS<br/>(E-KE)</b>    | -<br>(7.03)      | (5.17)           | (5.63)           | (8.9)          | (0)              | (1.450)          |                    |                    |               |
| <b>KE</b>               | (6.99)           | (6.20)           | (6.21)           | (9.6)          | (0)              | (1.449)          | (-0.772)           | (-0.503)           | (5.5)         |
| <b>TS<br/>(KE-KK)</b>   | 26.99<br>(18.60) | 27.48<br>(19.27) | 27.96<br>(19.87) | 12.0<br>(13.4) | 90<br>(86)       | 1.459<br>(1.464) |                    |                    |               |
| <b>KK</b>               | 11.63<br>(7.85)  | 11.14<br>(7.53)  | 11.14<br>(7.50)  | 9.4<br>(11.5)  | 180<br>(180)     | 1.435<br>(1.444) | -0.702<br>(-0.747) | -0.504<br>(-0.501) | 5.0<br>(5.3)  |
| <b>TS<br/>(KK-K)</b>    | 13.94<br>(11.0)  | 10.88<br>(7.97)  | 11.06<br>(7.98)  | 8.2<br>(10.2)  | 180<br>(180)     | 1.441<br>(1.447) |                    |                    |               |
| <b>K</b>                | 7.99<br>(5.51)   | 8.24<br>(5.83)   | 8.26<br>(5.86)   | 6.7<br>(8.8)   | 180<br>(180)     | 1.458<br>(1.460) | -0.664<br>(-0.713) | -0.552<br>(-0.558) | 5.1<br>(5.2)  |
| Excited state           |                  |                  |                  |                |                  |                  |                    |                    |               |
| <b>E*</b>               | 12.61<br>(11.32) | 11.72<br>(10.97) | 12.16<br>(11.00) | 4.1<br>(4.9)   | 0<br>(0)         | 1.410<br>(1.406) | -0.625<br>(-0.643) | -0.542<br>(-0.552) | 5.6<br>(5.6)  |
| <b>TS<br/>(E*-KE*)</b>  | 16.08<br>(13.99) | 12.43<br>(11.14) | 13.15<br>(11.59) | 5.6<br>(6.4)   | 0<br>(0)         | 1.409<br>(1.406) |                    |                    |               |
| <b>KE*</b>              | 11.18<br>(9.30)  | 10.05<br>(8.85)  | 10.21<br>(8.52)  | 8.3<br>(9.5)   | 0<br>(0)         | 1.423<br>(1.409) | -0.625<br>(-0.667) | -0.514<br>(-0.503) | 5.1<br>(5.4)  |
| <b>TS<br/>(KE*-KK*)</b> | 20.95<br>(27.98) | 20.07<br>(27.63) | 20.24<br>(27.19) | 12.3<br>(13.3) | 92<br>(91)       | 1.460<br>(1.451) |                    |                    |               |
| <b>KK*</b>              | 10.05<br>(7.94)  | 8.94<br>(7.52)   | 9.26<br>(7.40)   | 9.0<br>(10.8)  | 180<br>(180)     | 1.422<br>(1.411) | -0.597<br>(-0.642) | -0.521<br>(-0.515) | 5.0<br>(5.3)  |
| <b>TS<br/>(KK*-K*)</b>  | 13.28<br>(10.68) | 9.94<br>(8.03)   | 10.85<br>(8.52)  | 8.2<br>(10.0)  | 180<br>(180)     | 1.422<br>(1.423) |                    |                    |               |
| <b>K*</b>               | 0.00<br>(0.00)   | 0.00<br>(0.00)   | 0.00<br>(0.00)   | 7.3<br>(9.2)   | 180<br>(180)     | 1.431<br>(1.435) | -0.622<br>(-0.642) | -0.517<br>(-0.525) | 4.8<br>(5.1)  |

Table S2. Bond lengths of the bonds of the tautomeric forms of the studied compounds in ground and excited state in toluene and in acetonitrile (in brackets).

| Bond            | Bond length, Å |               |               |               |
|-----------------|----------------|---------------|---------------|---------------|
|                 | <b>7HQ-A</b>   |               |               |               |
|                 | <b>E</b>       | <b>E*</b>     | <b>KE</b>     | <b>KE*</b>    |
| O-C             | 1.338 (1.342)  | 1.322 (1.326) | -             | 1.251 (1.259) |
| C-C (quinoline) | 1.394 (1.393)  | 1.464 (1.468) | -             | 1.472 (1.490) |
| C-C (axle)      | 1.467 (1.468)  | 1.410 (1.406) | -             | 1.423 (1.409) |
| C-N             | 1.377 (1.379)  | 1.384 (1.386) | -             | 1.398 (1.398) |
| <b>7HQ-B</b>    |                |               |               |               |
|                 | <b>E</b>       | <b>E*</b>     | <b>KE</b>     | <b>KE*</b>    |
| O-C             | 1.341 (1.344)  | 1.325 (1.328) | -             | 1.256 (1.261) |
| C-C             | 1.393 (1.393)  | 1.470 (1.472) | -             | 1.468 (1.487) |
| C-C (axle)      | 1.472 (1.473)  | 1.418 (1.413) | -             | 1.430 (1.413) |
| C-N             | 1.349 (1.350)  | 1.364 (1.366) | -             | 1.419 (1.412) |
| <b>7HQ-C</b>    |                |               |               |               |
|                 | <b>E</b>       | <b>E*</b>     | <b>KE</b>     | <b>KE*</b>    |
| O-C             | 1.330 (1.335)  | 1.324 (1.329) | 1.254 (1.260) | 1.254 (1.257) |
| C-C             | 1.394 (1.394)  | 1.462 (1.465) | 1.438 (1.435) | 1.494 (1.495) |
| C-C (axle)      | 1.458 (1.459)  | 1.397 (1.391) | 1.420 (1.424) | 1.410 (1.408) |
| C-N             | 1.323 (1.325)  | 1.359 (1.366) | 1.348 (1.348) | 1.361 (1.365) |
| <b>3HP-A</b>    |                |               |               |               |
|                 | <b>E</b>       | <b>E*</b>     | <b>KE</b>     | <b>KE*</b>    |
| O-C             | 1.345 (1.347)  | 1.326 (1.326) | -             | 1.255 (1.256) |
| C-C             | 1.407 (1.407)  | 1.436 (1.446) | -             | 1.469 (1.477) |
| C-C (axle)      | 1.465 (1.465)  | 1.406 (1.394) | -             | 1.428 (1.403) |
| C-N             | 1.369 (1.370)  | 1.359 (1.368) | -             | 1.393 (1.395) |
| <b>3HP-B</b>    |                |               |               |               |
|                 | <b>E</b>       | <b>E*</b>     | <b>KE</b>     | <b>KE*</b>    |
| O-C             | 1.346 (1.348)  | 1.342 (1.330) | -             | 1.261 (1.258) |
| C-C             | 1.407 (1.407)  | 1.408 (1.450) | -             | 1.472 (1.480) |
| C-C (axle)      | 1.468 (1.469)  | 1.448 (1.396) | -             | 1.429 (1.409) |
| C-N             | 1.342 (1.342)  | 1.313 (1.357) | -             | 1.409 (1.406) |
| <b>3HP-C</b>    |                |               |               |               |
|                 | <b>E</b>       | <b>E*</b>     | <b>KE</b>     | <b>KE*</b>    |
| O-C             | 1.339 (1.342)  | 1.320 (1.323) | 1.262 (1.267) | 1.259 (1.256) |
| C-C             | 1.404 (1.404)  | 1.453 (1.457) | 1.437 (1.434) | 1.472 (1.479) |
| C-C (axle)      | 1.459 (1.460)  | 1.385 (1.380) | 1.424 (1.431) | 1.414 (1.405) |
| C-N             | 1.314 (1.316)  | 1.364 (1.370) | 1.345 (1.338) | 1.363 (1.368) |

Table S3. Spectra characteristics (B3LYP/TZVP//M06-2X/TZVP) ( $\lambda_{\max}$  of  $S_0-S_1$  and  $S_0-S_2$  transitions corresponding oscillator strengths of all tautomeric forms) of the studied compounds in toluene and in acetonitrile (in brackets).

| State        | $S_0-S_1$             |             | $S_0-S_2$             |             |
|--------------|-----------------------|-------------|-----------------------|-------------|
|              | $\lambda_{\max}$ , nm | $f$         | $\lambda_{\max}$ , nm | $f$         |
| <b>7HQ-A</b> |                       |             |                       |             |
| E            | 363 (359)             | 0.29 (0.24) | 327 (319)             | 0.13 (0.11) |
| KK           | 474 (429)             | 0.35 (0.35) | 392 (380)             | 0.07 (0.05) |
| K            | 472 (456)             | 0.09 (0.08) | 373 (360)             | 0.00 (0.33) |
| <b>7HQ-B</b> |                       |             |                       |             |
| E            | 352 (350)             | 0.22 (0.18) | 316 (315)             | 0.03 (0.06) |
| KK           | 441 (403)             | 0.01 (0.18) | 411 (393)             | 0.38 (0.15) |
| K            | 461 (444)             | 0.09 (0.09) | 379 (359)             | 0.00 (0.02) |
| <b>7HQ-C</b> |                       |             |                       |             |
| E            | 366 (357)             | 0.32 (0.34) | 312 (305)             | 0.01 (0.01) |
| KE           | 382 (377)             | 0.37 (0.35) | 334 (326)             | 0.31 (0.27) |
| KK           | 382 (377)             | 0.40 (0.40) | 334 (326)             | 0.30 (0.30) |
| K            | 463 (440)             | 0.07 (0.08) | 349 (334)             | 0.00 (0.17) |
| ZW           | 548 (483)             | 0.06 (0.06) | 496 (436)             | 0.01 (0.01) |
| <b>3HP-A</b> |                       |             |                       |             |
| E            | 331 (325)             | 0.45 (0.41) | 290 (288)             | 0.06 (0.08) |
| KK           | 530 (446)             | 0.28 (0.29) | 435 (372)             | 0.00 (0.00) |
| K            | 408 (392)             | 0.51 (0.51) | 365 (345)             | 0.00 (0.00) |
| <b>3HP-B</b> |                       |             |                       |             |
| E            | 319 (317)             | 0.24 (0.24) | 295 (292)             | 0.01 (0.00) |
| KK           | 496 (418)             | 0.00 (0.10) | 439 (401)             | 0.51 (0.38) |
| K            | 405 (390)             | 0.50 (0.49) | 375 (353)             | 0.00 (0.00) |
| <b>3HP-C</b> |                       |             |                       |             |
| E            | 320 (317)             | 0.75 (0.71) | 286 (286)             | 0.04 (0.03) |
| KE           | 389 (379)             | 0.57 (0.54) | 359 (348)             | 0.00 (0.00) |
| KK           | 389 (379)             | 0.57 (0.54) | 359 (348)             | 0.00 (0.00) |
| K            | 414 (401)             | 0.59 (0.57) | 352 (338)             | 0.00 (0.00) |
| ZW           | 455 (413)             | 0.05 (0.10) | 422 (392)             | 0.61 (0.52) |

## 7HQ

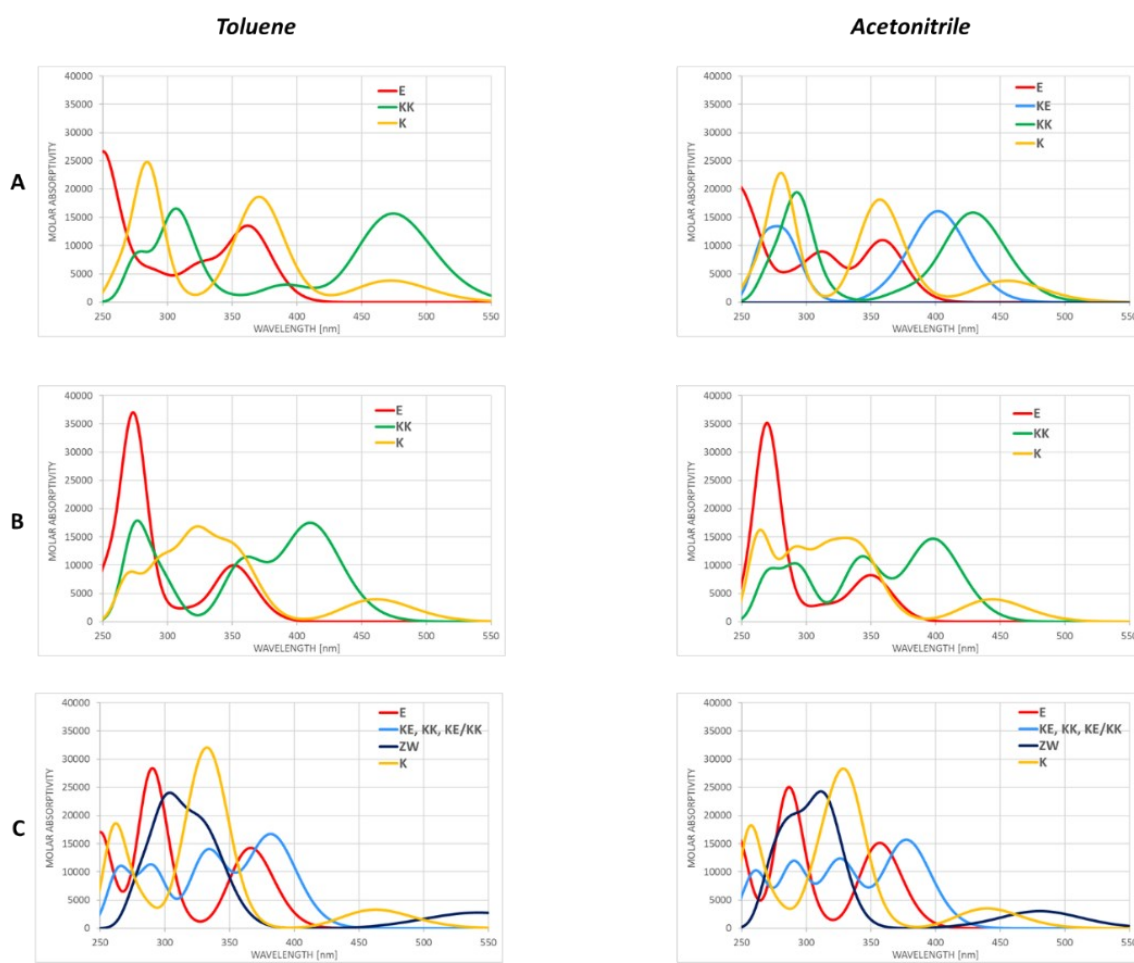

Figure S1. Predicted (B3LYP/TZVP//M06-2X/TZVP) absorption spectra of **7HQ** derivatives in toluene and acetonitrile.

### EXCITED STATE

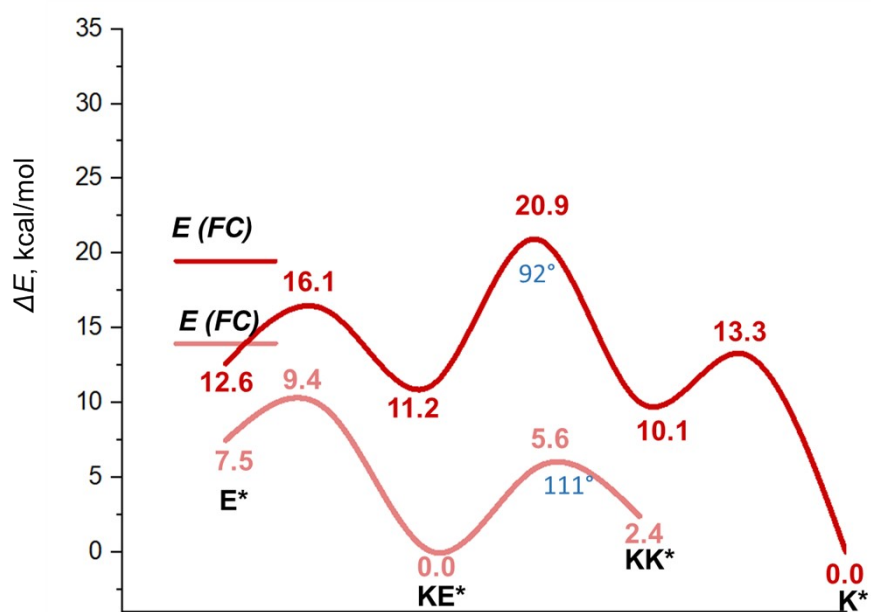

### GROUND STATE

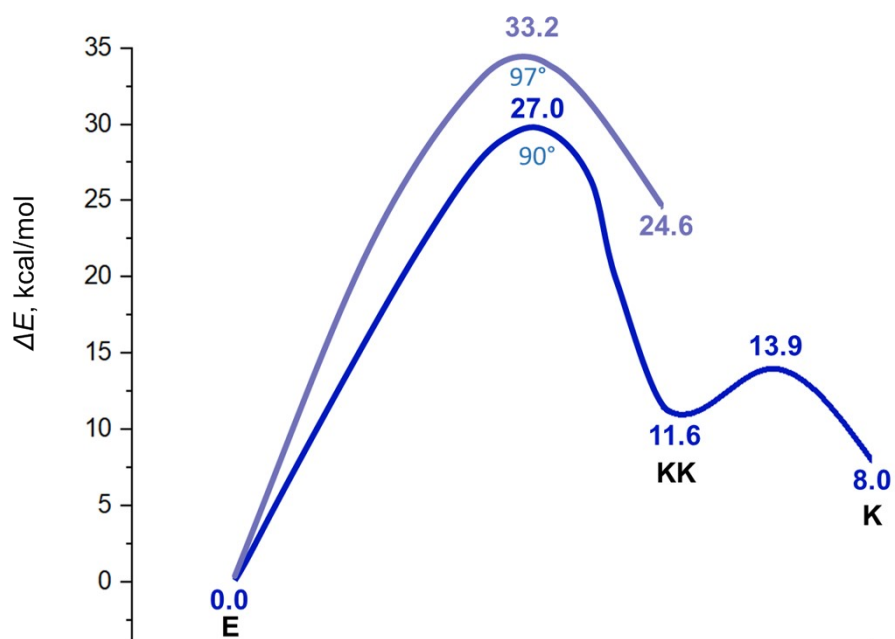

Figure S2. Ground (M06-2X/TZVP) and excited (CAM-B3LYP/TZVP) state PES of **7HQ-A** (saturated) and **P-A** (pale) in toluene. Relative energies are given in kcal/mol units.

Table S4. Relative energies and other electronic and structural parameters of **P-A** in ground (M06-2X/TZVP) and first singlet excited (CAM-B3LYP/TZVP) state in toluene and acetonitrile (in brackets).

| Structure                    | $\Delta E$       | $\Delta E+ZPE$   | $\Delta G$       | $\mu$          | $\alpha$     | axle length      |
|------------------------------|------------------|------------------|------------------|----------------|--------------|------------------|
|                              | [kcal/mol]       |                  |                  | [D]            | [°]          | [Å]              |
| Ground state                 |                  |                  |                  |                |              |                  |
| <b>E</b>                     | 0.00<br>(0.00)   | 0.00<br>(0.00)   | 0.00<br>(0.00)   | 6.6<br>(7.8)   | 4<br>(3)     | 1.465<br>(1.466) |
| <b>TS<br/>(E-KE)</b>         | ( )              | ( )              | ( )              | ( )            | ( )          | ( )              |
| <b>KE</b>                    | ( )              | ( )              | ( )              | ( )            | ( )          | ( )              |
| <b>TS<br/>(KE-KK)</b>        | 33.22<br>(23.23) | 33.19<br>(23.47) | 33.83<br>(24.22) | 15.4<br>(17.8) | 97<br>(98)   | 1.461<br>(1.467) |
| <b>KK</b>                    | 24.62<br>(17.15) | 24.11<br>(17.14) | 23.86<br>(17.04) | 13.9<br>(16.7) | 180<br>(180) | 1.432<br>(1.445) |
| <b>TS<br/>(KK-K)</b>         | ( )              | ( )              | ( )              | ( )            | ( )          | ( )              |
| <b>K</b>                     | ( )              | ( )              | ( )              | ( )            | ( )          | ( )              |
| Excited state                |                  |                  |                  |                |              |                  |
| <b>E*</b>                    | 7.49<br>(6.47)   | 6.47<br>(5.46)   | 6.52<br>(5.71)   | 6.5<br>(7.5)   | 0<br>(0)     | 1.418<br>(1.409) |
| <b>TS<br/>(E*-KE*)</b>       | 9.38<br>(8.86)   | 6.16<br>(5.63)   | 6.67<br>(6.17)   | 8.1<br>(9.5)   | 0<br>(0)     | 1.409<br>(1.396) |
| <b>KE*</b>                   | 0.00<br>(0.00)   | 0.00<br>(0.00)   | 0.00<br>(0.00)   | 12.6<br>(14.2) | 4<br>(0)     | 1.439<br>(1.408) |
| <b>TS<br/>(KE*-<br/>KK*)</b> | 5.63<br>(16.16)  | 5.97<br>(16.07)  | 6.63<br>(15.97)  | 16.2<br>(17.7) | 111<br>(92)  | 1.464<br>(1.457) |
| <b>KK*</b>                   | 2.40<br>(2.46)   | 2.44<br>(2.45)   | 2.02<br>(1.69)   | 14.2<br>(16.0) | 179<br>(180) | 1.441<br>(1.409) |
| <b>TS<br/>(KK*-K*)</b>       | ( )              | ( )              | ( )              | ( )            | ( )          | ( )              |
| <b>K*</b>                    | ( )              | ( )              | ( )              | ( )            | ( )          | ( )              |

Table S5. Relative energies and other electronic and structural parameters of **3HP-A** in ground (M06-2X/TZVP) and first singlet excited (CAM-B3LYP/TZVP) state in toluene and acetonitrile (in brackets).

| Structure               | $\Delta E$       | $\Delta E+ZPE$   | $\Delta G$       | $\mu$          | $\alpha$     | axle length      | atomic charge      |                    | HOMO-LUMO gap |
|-------------------------|------------------|------------------|------------------|----------------|--------------|------------------|--------------------|--------------------|---------------|
|                         |                  |                  |                  |                |              |                  | O                  | N                  |               |
|                         |                  |                  | [kcal/mol]       | [D]            | [°]          | [Å]              |                    |                    | eV            |
| Ground state            |                  |                  |                  |                |              |                  |                    |                    |               |
| <b>E</b>                | 0.00<br>(0.00)   | 0.00<br>(0.00)   | 0.00<br>(0.00)   | 4.6<br>(5.4)   | 0<br>(0)     | 1.465<br>(1.465) | -0.679<br>(-0.691) | -0.529<br>(-0.541) | 6.4<br>(6.5)  |
| <b>TS<br/>(E-KE)</b>    | ( )              | ( )              | ( )              | ( )            | ( )          | ( )              |                    |                    |               |
| <b>KE</b>               | ( )              | ( )              | ( )              | ( )            | ( )          | ( )              | ( )                | ( )                | ( )           |
| <b>TS<br/>(KE-KK)</b>   | 32.25<br>(45.45) | 32.24<br>(45.07) | 32.63<br>(45.51) | 14.0<br>(15.5) | 93<br>(93)   | 1.472<br>(1.479) |                    |                    |               |
| <b>KK</b>               | 18.39<br>(12.42) | 18.13<br>(12.37) | 18.11<br>(12.33) | 12.4<br>(14.7) | 180<br>(180) | 1.437<br>(1.448) | -0.738<br>(-0.783) | -0.479<br>(-0.475) | 4.7<br>(5.3)  |
| <b>TS<br/>(KK-K)</b>    | 31.26<br>(27.53) | 28.28<br>(24.65) | 28.41<br>(24.81) | 10.0<br>(11.6) | 180<br>(180) | 1.449<br>(1.456) |                    |                    |               |
| <b>K</b>                | 11.24<br>(8.56)  | 11.24<br>(8.74)  | 10.98<br>(8.51)  | 5.3<br>(6.4)   | 180<br>(180) | 1.445<br>(1.448) | -0.704<br>(-0.750) | -0.509<br>(-0.518) | 5.4<br>(5.6)  |
| Excited state           |                  |                  |                  |                |              |                  |                    |                    |               |
| <b>E*</b>               | 8.96<br>(10.69)  | 8.09<br>(9.69)   | 8.51<br>(9.96)   | 4.6<br>(5.3)   | 0<br>(0)     | 1.406<br>(1.394) | -0.623<br>(-0.631) | -0.555<br>(-0.571) | 6.2<br>(6.2)  |
| <b>TS<br/>(E*-KE*)</b>  | 11.28<br>(13.01) | 8.05<br>(9.57)   | 8.61<br>(10.04)  | 6.8<br>(7.8)   | 0<br>(0)     | 1.401<br>(1.392) |                    |                    |               |
| <b>KE*</b>              | 1.82<br>(3.60)   | 1.71<br>(3.26)   | 1.94<br>(3.29)   | 11.2<br>(12.6) | 0<br>(0)     | 1.428<br>(1.403) | -0.603<br>(-0.630) | -0.506<br>(-0.505) | 5.0<br>(5.4)  |
| <b>TS<br/>(KE*-KK*)</b> | 12.46<br>(25.8)  | 12.15<br>(25.13) | 12.50<br>(25.22) | 14.9<br>(16.0) | 92<br>(87)   | 1.467<br>(1.458) |                    |                    |               |
| <b>KK*</b>              | 1.49<br>(4.25)   | 1.44<br>(3.87)   | 1.60<br>(3.68)   | 12.4<br>(14.0) | 180<br>(180) | 1.430<br>(1.404) | -0.564<br>(-0.603) | -0.508<br>(-0.509) | 4.7<br>(5.3)  |
| <b>TS<br/>(KK*-K*)</b>  | 19.80<br>(21.12) | 16.94<br>(18.02) | 17.40<br>(18.29) | 9.4<br>(11.1)  | 180<br>(180) | 1.409<br>(1.401) |                    |                    |               |
| <b>K*</b>               | 0.00<br>(0.00)   | 0.00<br>(0.00)   | 0.00<br>(0.00)   | 5.5<br>(6.3)   | 180<br>(180) | 1.405<br>(1.398) | -0.527<br>(-0.579) | -0.519<br>(-0.579) | 5.4<br>(5.5)  |



### 3HP

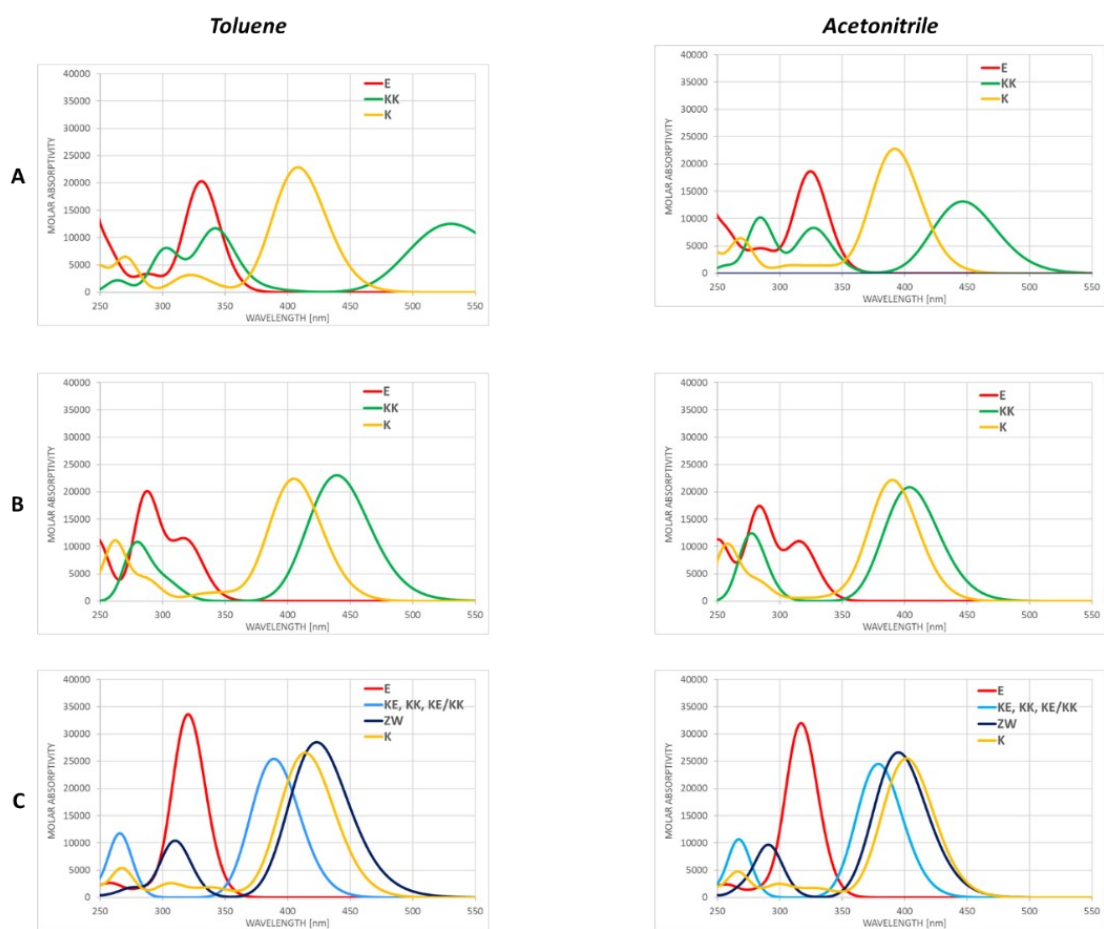

Figure S3. Predicted (B3LYP/TZVP//M06-2X/TZVP) absorption spectra of **3HP** derivatives in toluene and acetonitrile.

Table S6. Relative energies and other electronic and structural parameters of **7HQ-B** in ground (M06-2X/TZVP) and first singlet excited (CAM-B3LYP/TZVP) state in toluene and acetonitrile (in brackets).

| Structure               | $\Delta E$       | $\Delta E+ZPE$   | $\Delta G$       | $\mu$          | $\alpha$     | axle length      | atomic charge      |                    | HOMO-LUMO gap<br>eV |
|-------------------------|------------------|------------------|------------------|----------------|--------------|------------------|--------------------|--------------------|---------------------|
|                         |                  |                  |                  |                |              |                  | O                  | N                  |                     |
| [kcal/mol]              |                  |                  |                  |                |              |                  |                    |                    |                     |
| [D]                     |                  |                  |                  |                |              |                  |                    |                    |                     |
| [°]                     |                  |                  |                  |                |              |                  |                    |                    |                     |
| [Å]                     |                  |                  |                  |                |              |                  |                    |                    |                     |
| Ground state            |                  |                  |                  |                |              |                  |                    |                    |                     |
| <b>E</b>                | 0.00<br>(0.00)   | 0.00<br>(0.00)   | 0.00<br>(0.00)   | 2.4<br>(2.8)   | 8<br>(13)    | 1.472<br>(1.473) | -0.676<br>(-0.686) | -0.361<br>(-0.367) | 6.1<br>(6.1)        |
| <b>TS<br/>(E-KE)</b>    | ( )              | ( )              | ( )              | ( )            | ( )          | ( )              |                    |                    |                     |
| <b>KE</b>               | ( )              | ( )              | ( )              | ( )            | ( )          | ( )              | ( )                | ( )                | ( )                 |
| <b>TS<br/>(KE-KK)</b>   | 34.07<br>(25.21) | 34.00<br>(25.14) | 34.66<br>(25.78) | 11.9<br>(13.3) | 92<br>(87)   | 1.460<br>(1.465) |                    |                    |                     |
| <b>KK</b>               | 17.43<br>(13.37) | 16.14<br>(12.08) | 16.15<br>(11.83) | 9.6<br>(12.1)  | 180<br>(180) | 1.432<br>(1.441) | -0.683<br>(-0.732) | -0.351<br>(-0.342) | 5.4<br>(5.5)        |
| <b>TS<br/>(KK-K)</b>    | 18.01<br>(14.41) | 14.83<br>(11.07) | 15.22<br>(11.28) | 9.3<br>(11.7)  | 180<br>(180) | 1.438<br>(1.445) |                    |                    |                     |
| <b>K</b>                | 8.13<br>(5.01)   | 8.16<br>(4.88)   | 8.28<br>(4.36)   | 8.4<br>(11.0)  | 180<br>(179) | 1.463<br>(1.464) | -0.650<br>(-0.703) | -0.380<br>(-0.378) | 5.2<br>(5.3)        |
| Excited state           |                  |                  |                  |                |              |                  |                    |                    |                     |
| <b>E*</b>               | 14.20<br>(13.51) | 13.02<br>(12.37) | 12.68<br>(12.08) | 2.2<br>(2.6)   | 3<br>(6)     | 1.418<br>(1.413) | -0.623<br>(-0.639) | -0.369<br>(-0.377) | 5.8<br>(5.8)        |
| <b>TS<br/>(E*-KE*)</b>  | 20.23<br>(18.33) | 16.82<br>(14.69) | 17.12<br>(14.67) | 4.4<br>(4.8)   | 10<br>(9)    | 1.414<br>(1.412) |                    |                    |                     |
| <b>KE*</b>              | 16.98<br>(14.49) | 16.38<br>(13.90) | 16.76<br>(13.78) | 7.8<br>(7.9)   | 29<br>(19)   | 1.431<br>(1.413) | -0.615<br>(-0.662) | -0.390<br>(-0.382) | 5.3<br>(5.5)        |
| <b>TS<br/>(KE*-KK*)</b> | 24.31<br>(30.71) | 23.09<br>(29.61) | 23.75<br>(30.00) | 10.9<br>(13.0) | 132<br>(93)  | 1.447<br>(1.466) |                    |                    |                     |
| <b>KK*</b>              | 17.40<br>(13.54) | 14.94<br>(11.50) | 15.81<br>(11.63) | 9.3<br>(11.6)  | 180<br>(180) | 1.426<br>(1.422) | -0.598<br>(-0.636) | -0.349<br>(-0.349) | 5.5<br>(5.5)        |
| <b>TS<br/>(KK*-K*)</b>  | 17.43<br>(14.38) | 14.19<br>(10.58) | 14.28<br>(10.26) | 9.2<br>(11.4)  | 180<br>(180) | 1.427<br>(1.429) |                    |                    |                     |
| <b>K*</b>               | 0.00<br>(0.00)   | 0.00<br>(0.00)   | 0.00<br>(0.00)   | 9.1<br>(11.4)  | 173<br>(168) | 1.440<br>(1.444) | -0.603<br>(-0.626) | -0.334<br>(-0.335) | 4.9<br>(5.2)        |

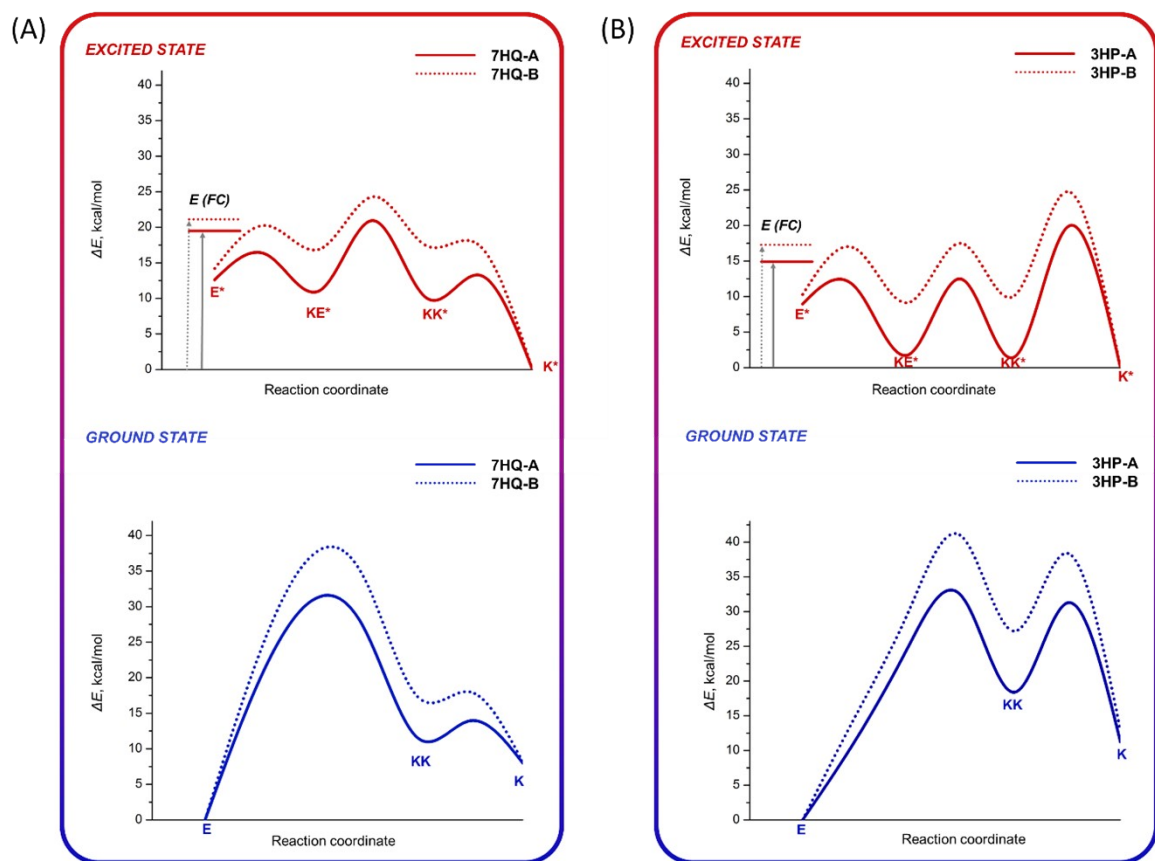

Figure S4. Comparison between the PES in toluene of **7HQ-A** and **7HQ-B** (A); **3HP-A** and **3HP-B** (B).

## EXCITED STATE

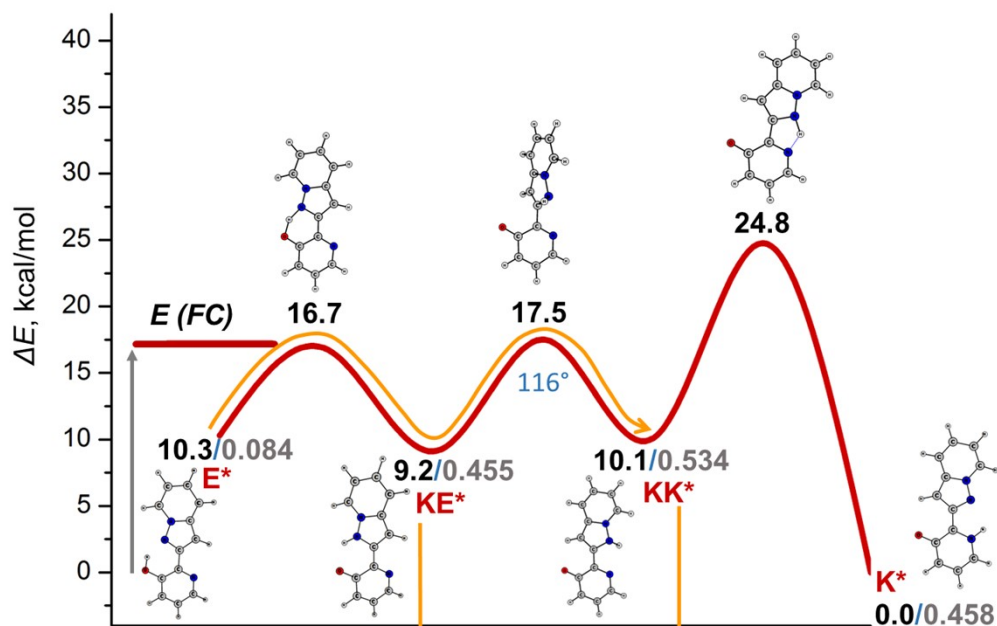

## GROUND STATE

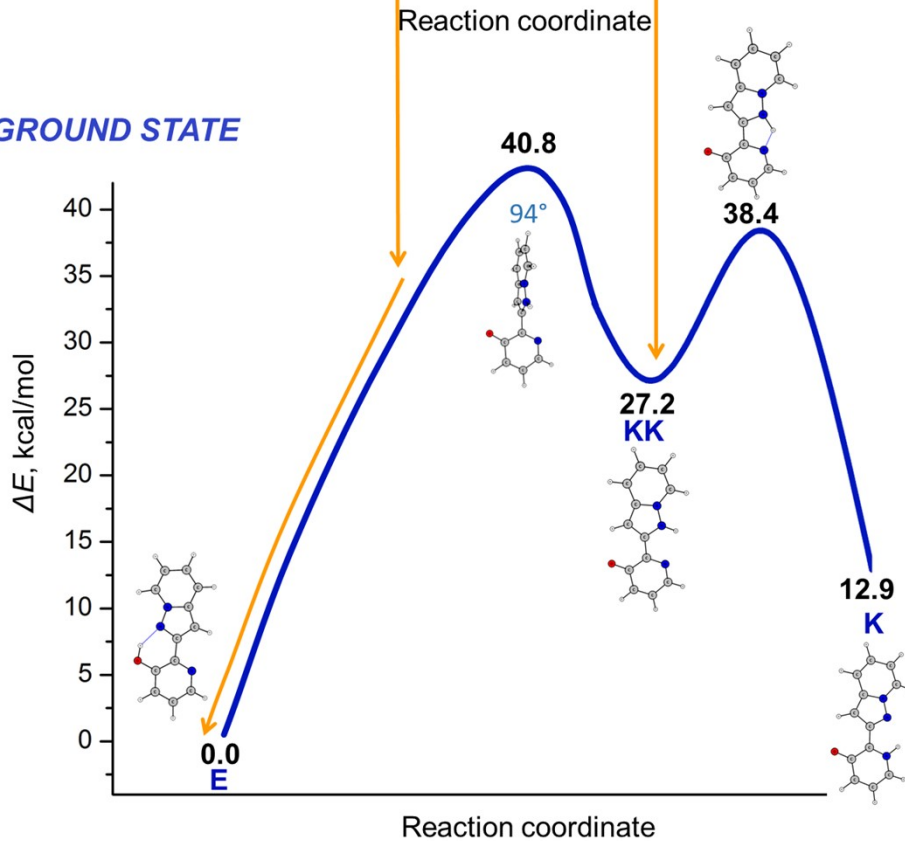

Figure S5. Ground (M06-2X/TZVP) and excited (CAM-B3LYP/TZVP) state PES of **3HP-B** in toluene. The orange arrows indicate the supposed PT pathways. Relative energies are given in kcal/mol units (black), followed by the dipole moment in D (grey).

Table S7. Relative energies and other electronic and structural parameters of **3HP-B** in ground (M06-2X/TZVP) and first singlet excited (CAM-B3LYP/TZVP) state in toluene and acetonitrile (in brackets).

| Structure           | $\Delta E$       | $\Delta E+ZPE$   | $\Delta G$       | $\mu$          | $\alpha$     | axle length      | atomic charge      |                    | HOMO-LUMO gap |
|---------------------|------------------|------------------|------------------|----------------|--------------|------------------|--------------------|--------------------|---------------|
|                     | [kcal/mol]       |                  |                  | [D]            | [°]          |                  | O                  | N                  |               |
| Ground state        |                  |                  |                  |                |              |                  |                    |                    |               |
| <b>E</b>            | 0.00<br>(0.00)   | 0.00<br>(0.00)   | 0.00<br>(0.00)   | 3.5<br>(4.0)   | 0<br>(0)     | 1.468<br>(1.469) | -0.673<br>(-0.683) | -0.349<br>(-0.355) | 6.6<br>(6.6)  |
| <b>TS (E-KE)</b>    | ( )              | ( )              | ( )              | ( )            | ( )          | ( )              |                    |                    |               |
| <b>KE</b>           | ( )              | ( )              | ( )              | ( )            | ( )          | ( )              | ( )                | ( )                | ( )           |
| <b>TS (KE-KK)</b>   | 40.85<br>(30.61) | 40.38<br>(30.38) | 40.80<br>(30.92) | 13.8<br>(15.5) | 94<br>(93)   | 1.475<br>(1.479) |                    |                    |               |
| <b>KK</b>           | 27.17<br>(20.78) | 26.33<br>(20.15) | 25.90<br>(19.92) | 12.3<br>(14.8) | 180<br>(180) | 1.433<br>(1.445) | -0.720<br>(-0.771) | -0.323<br>(-0.314) | 5.1<br>(5.5)  |
| <b>TS (KK-K)</b>    | 38.40<br>(33.94) | 35.11<br>(30.81) | 34.78<br>(30.64) | 10.7<br>(12.7) | 180<br>(180) | 1.451<br>(1.460) |                    |                    |               |
| <b>K</b>            | 12.91<br>(9.66)  | 12.89<br>(9.86)  | 12.29<br>(9.43)  | 6.9<br>(8.4)   | 180<br>(180) | 1.452<br>(1.454) | -0.694<br>(-0.744) | -0.334<br>(-0.334) | 5.5<br>(5.6)  |
| Excited state       |                  |                  |                  |                |              |                  |                    |                    |               |
| <b>E*</b>           | 10.29<br>(13.33) | 9.51<br>(12.21)  | 9.81<br>(12.55)  | 3.5<br>(3.9)   | 0<br>(0)     | 1.448<br>(1.396) | -0.650<br>(-0.629) | -0.291<br>(-0.398) | 6.3<br>(6.3)  |
| <b>TS (E*-KE*)</b>  | 16.73<br>(17.38) | 14.11<br>(14.59) | 14.82<br>(15.30) | 5.9<br>(6.7)   | 7<br>(5)     | 1.402<br>(1.395) |                    |                    |               |
| <b>KE*</b>          | 9.15<br>(8.84)   | 9.36<br>(9.06)   | 9.66<br>(9.37)   | 10.1<br>(11.2) | 21<br>(12)   | 1.429<br>(1.409) | -0.601<br>(-0.631) | -0.378<br>(-0.373) | 5.3<br>(5.5)  |
| <b>TS (KE*-KK*)</b> | 17.50<br>(26.14) | 17.23<br>(25.99) | 17.65<br>(26.38) | 14.1<br>(15.5) | 116<br>(91)  | 1.463<br>(1.448) |                    |                    |               |
| <b>KK*</b>          | 10.13<br>(9.33)  | 9.97<br>(9.42)   | 10.07<br>(9.43)  | 12.1<br>(13.7) | 174<br>(177) | 1.431<br>(1.410) | -0.572<br>(-0.605) | -0.371<br>(-0.373) | 5.0<br>(5.3)  |
| <b>TS (KK*-K*)</b>  | 24.78<br>(25.12) | 22.15<br>(22.41) | 22.67<br>(22.91) | 9.9<br>(11.6)  | 180<br>(180) | 1.414<br>(1.405) |                    |                    |               |
| <b>K*</b>           | 0.00<br>(0.00)   | 0.00<br>(0.00)   | 0.00<br>(0.00)   | 7.0<br>(8.2)   | 180<br>(180) | 1.411<br>(1.404) | -0.505<br>(-0.559) | -0.347<br>(-0.352) | 5.4<br>(5.5)  |

Table S8. Relative energies of different IPT mechanisms for the conversion **E** to **K** in **7HQ-C** in ground (M06-2X/TZVP) and first singlet excited (CAM-B3LYP/TZVP) state in toluene.

| Structure        | $\Delta E$ | $\Delta E+ZPE$ | $\Delta G$ |
|------------------|------------|----------------|------------|
|                  | [kcal/mol] |                |            |
| <b>Path I</b>    |            |                |            |
| Ground state     |            |                |            |
| E                | 0.00       | 0.00           | 0.00       |
| TS (E-KE/KK)     | 5.63       | 3.22           | 3.46       |
| KE/KK            | 3.91       | 3.86           | 3.86       |
| TS (KE/KK -K)    | 10.17      | 7.44           | 7.68       |
| K                | 6.23       | 6.06           | 5.56       |
| Excited state    |            |                |            |
| E*               | 10.38      | 9.63           | 9.73       |
| TS (E*-KE*/KK*)  | 14.30      | 10.78          | 10.90      |
| KE*/KK*          | 8.98       | 8.16           | 7.94       |
| TS (KE*/KK* -K*) | 12.34      | 9.15           | 9.49       |
| K*               | 0.00       | 0.00           | 0.00       |
| <b>Path II</b>   |            |                |            |
| Ground state     |            |                |            |
| E                | 0.00       | 0.00           | 0.00       |
| TS (E-ZW)        | 13.06      | 10.51          | 11.04      |
| ZW               | 12.91      | 12.04          | 12.25      |
| TS (ZW-K)        | 14.14      | 11.66          | 12.11      |
| K                | 6.23       | 6.06           | 5.56       |
| Excited state    |            |                |            |
| E*               | 10.38      | 9.63           | 9.73       |
| TS (E*-ZW*)      | 13.81      | 10.68          | 11.16      |
| ZW*              | 1.64       | 2.31           | 2.68       |
| TS (ZW*-K*)      | 4.93       | 2.31           | 2.68       |
| K*               | 0.00       | 0.00           | 0.00       |
| <b>Path III</b>  |            |                |            |
| Ground state     |            |                |            |
| E                | 0.00       | 0.00           | 0.00       |
| TS (E-KE)        | 5.63       | 3.22           | 3.46       |
| KE               | 3.91       | 3.86           | 3.86       |
| TS (KE-KK)       | 10.17      | 7.44           | 7.68       |
| KK*              | 5.63       | 3.22           | 3.46       |
| TS (KK*-K*)      | 3.91       | 3.86           | 3.86       |
| K*               | 6.23       | 6.06           | 5.56       |
| Excited state    |            |                |            |
| E*               | 10.38      | 9.63           | 9.73       |
| TS (E*-KE*)      | 14.30      | 10.78          | 10.90      |
| KE*              | 8.98       | 8.16           | 7.94       |
| TS (KE*-KK*)     | 22.59      | 22.48          | 22.60      |
| TS (KE*-KK*)     | 20.94      | 21.11          | 20.50      |
| TS (KE*-KK*)     | 22.59      | 22.48          | 22.57      |
| KK*              | 8.98       | 8.16           | 7.94       |
| TS (KK*-K*)      | 12.34      | 9.15           | 9.49       |
| K*               | 0.00       | 0.00           | 0.00       |

## EXCITED STATE

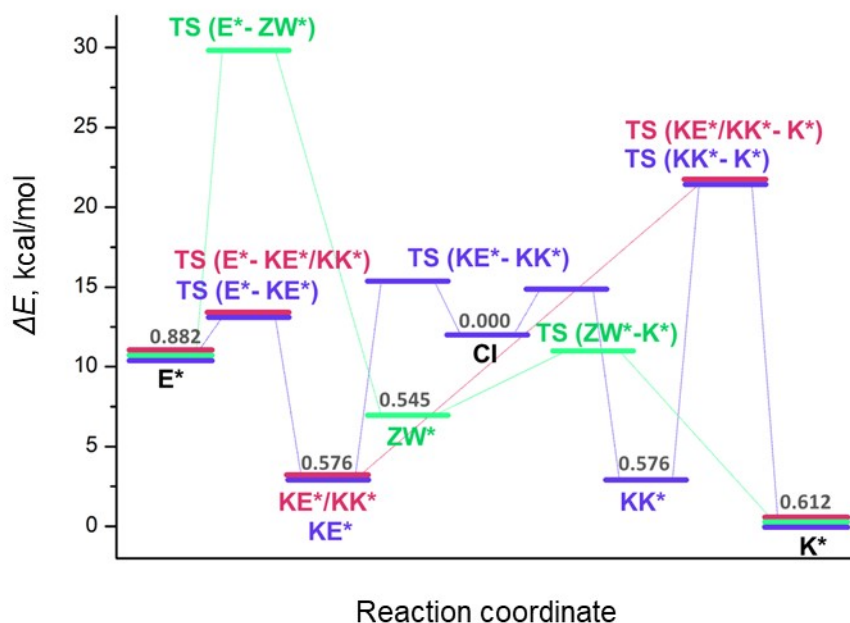

## GROUND STATE

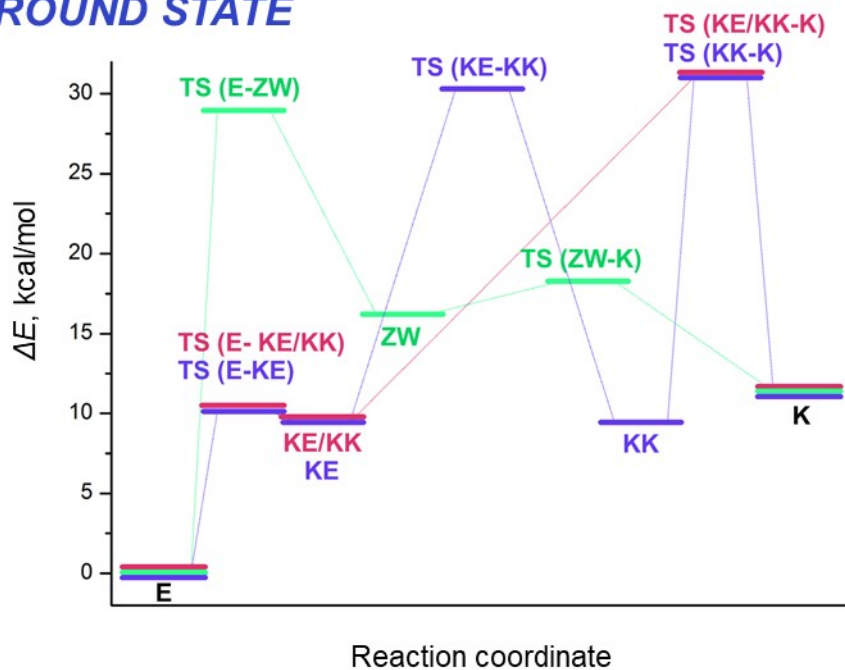

Figure S6. Alternative PESs of LRIPT of **3HP-C** in ground (M06-2X/TZVP) and first singlet excited (CAM-B3LYP) state in toluene. For the tautomeric forms in the excited state the oscillator strength is presented with gray color. The colors correspond to the colors from Scheme 5.

Table S9. Relative energies and other electronic and structural parameters of different IPT mechanisms for the conversion E to K in **3HP-C** in ground (M06-2X/TZVP) and first singlet excited (CAM-B3LYP/TZVP) state in toluene.

| Structure            | $\Delta E$ | $\Delta E+ZPE$ | $\Delta G$ |
|----------------------|------------|----------------|------------|
|                      | [kcal/mol] |                |            |
| <b>Path I</b>        |            |                |            |
| <i>Ground state</i>  |            |                |            |
| E                    | 0.00       | 0.00           | 0.00       |
| TS (E-KE/KK)         | 10.12      | 7.76           | 8.13       |
| KE/KK                | 9.44       | 9.07           | 9.09       |
| TS (KE/KK -K)        | 31.01      | 27.98          | 27.97      |
| K                    | 11.38      | 11.47          | 11.28      |
| <i>Excited state</i> |            |                |            |
| E*                   | 10.75      | 10.20          | 10.17      |
| TS (E*-KE*/KK*)      | 13.11      | 9.79           | 9.32       |
| KE*/KK*              | 2.91       | 2.61           | 2.28       |
| TS (KE*/KK* -K*)     | 21.42      | 18.47          | 18.60      |
| K*                   | 0.00       | 0.00           | 0.00       |
| <b>Path II</b>       |            |                |            |
| <i>Ground state</i>  |            |                |            |
| E                    | 0.00       | 0.00           | 0.00       |
| TS (E-ZW)            | 28.97      | 26.00          | 26.08      |
| ZW                   | 16.21      | 15.75          | 15.64      |
| TS (ZW-K)            | 18.29      | 15.40          | 15.56      |
| K                    | 11.38      | 11.47          | 11.28      |
| <i>Excited state</i> |            |                |            |
| E*                   | 10.75      | 10.20          | 10.17      |
| TS (E*-ZW*)          | 29.82      | 26.73          | 26.60      |
| ZW*                  | 6.95       | 6.36           | 6.37       |
| TS (ZW*-K*)          | 10.99      | 7.81           | 7.94       |
| K*                   | 0.00       | 0.00           | 0.00       |
| <b>Path III</b>      |            |                |            |
| <i>Ground state</i>  |            |                |            |
| E                    | 0.00       | 0.00           | 0.00       |
| TS (E-KE)            | 10.12      | 7.76           | 8.13       |
| KE                   | 9.44       | 9.07           | 9.10       |
| TS (KE-KK)           | 30.31      | 30.46          | 30.78      |
| KK*                  | 9.44       | 9.07           | 9.10       |
| TS (KK*-K*)          | 31.01      | 27.98          | 27.97      |
| K*                   | 11.38      | 11.47          | 11.28      |
| <i>Excited state</i> |            |                |            |
| E*                   | 10.75      | 10.20          | 10.17      |
| TS (E*-KE*)          | 13.11      | 9.79           | 9.32       |
| KE*                  | 2.91       | 2.61           | 2.28       |
| TS (KE*-KK*)         | 15.38      | 15.10          | 15.48      |
| TS (KE*-KK*)         | 14.14      | 14.53          | 14.14      |
| TS (KE*-KK*)         | 14.88      | 15.02          | 15.40      |
| KK*                  | 2.91       | 2.61           | 2.28       |
| TS (KK*-K*)          | 21.42      | 18.47          | 18.60      |
| K*                   | 0.00       | 0.00           | 0.00       |



Table S10. Relative energies and other electronic and structural parameters of **7HQ-A** in ground (M06-2X/TZVP) and first singlet excited (CAM-B3LYP/TZVP) state in toluene by using GD3 empirical dispersion correction.

| Structure           | $\Delta E$ | $\Delta E+ZPE$ | $\Delta G$ | $\mu$ | $\alpha$ | axle length |
|---------------------|------------|----------------|------------|-------|----------|-------------|
|                     | [kcal/mol] |                |            | [D]   | [°]      | [Å]         |
| Ground state        |            |                |            |       |          |             |
| <b>E</b>            | 0.00       | 0.00           | 0.00       | 4.2   | 0        | 1.467       |
| <b>TS (E-KE)</b>    |            |                |            |       |          |             |
| <b>KE</b>           |            |                |            |       |          |             |
| <b>TS (KE-KK)</b>   | 26.96      | 27.46          | 27.93      | 12.0  | 90       | 1.459       |
| <b>KK</b>           | 11.60      | 11.11          | 11.12      | 9.4   | 180      | 1.434       |
| <b>TS (KK-K)</b>    | 13.92      | 10.86          | 11.03      | 8.2   | 180      | 1.441       |
| <b>K</b>            | 7.98       | 8.23           | 8.24       | 6.7   | 180      | 1.458       |
| Excited state       |            |                |            |       |          |             |
| <b>E*</b>           | 12.77      | 11.91          | 12.46      | 4.1   | 0        | 1.410       |
| <b>TS (E*-KE*)</b>  | 16.38      | 12.71          | 13.55      | 5.5   | 0        | 1.408       |
| <b>KE*</b>          | 11.17      | 10.05          | 10.27      | 8.3   | 0        | 1.423       |
| <b>TS (KE*-KK*)</b> | 21.13      | 20.28          | 20.59      | 12.3  | 92       | 1.458       |
| <b>KK*</b>          | 9.87       | 8.79           | 9.24       | 9.1   | 180      | 1.422       |
| <b>TS (KK*-K*)</b>  | 13.25      | 9.91           | 10.95      | 8.2   | 180      | 1.422       |
| <b>K*</b>           | 0.00       | 0.00           | 0.00       | 7.3   | 180      | 1.430       |
